Correction

## Correction: KHSRP-bound small nucleolar RNAs associate with promotion of cell invasiveness and metastasis of pancreatic cancer

Keisuke Taniuchi<sup>1,2</sup> and Mitsunari Ogasawara<sup>1</sup>

<sup>1</sup>Department of Gastroenterology and Hepatology, Kochi Medical School, Kochi University, Nankoku, Kochi 783-8505, Japan

<sup>2</sup>Department of Endoscopic Diagnostics and Therapeutics, Kochi Medical School, Kochi University, Nankoku, Kochi 783-8505, Japan

Published: February 07, 2023

Copyright: © 2023 Taniuchi and Ogasawara. This is an open access article distributed under the terms of the [Creative Commons Attribution License](https://creativecommons.org/licenses/by/3.0/) (CC BY 3.0), which permits unrestricted use, distribution, and reproduction in any medium, provided the original author and source are credited.

**This article has been corrected:** In Figure 9, the panel C image contains an accidental partial overlap of the panel D image. The corrected Figure 9, produced using the original data, is shown below. The authors declare that these corrections do not change the results or conclusions of this paper.

Original article: Oncotarget. 2020; 11:131–147. <https://doi.org/10.18632/oncotarget.27413>

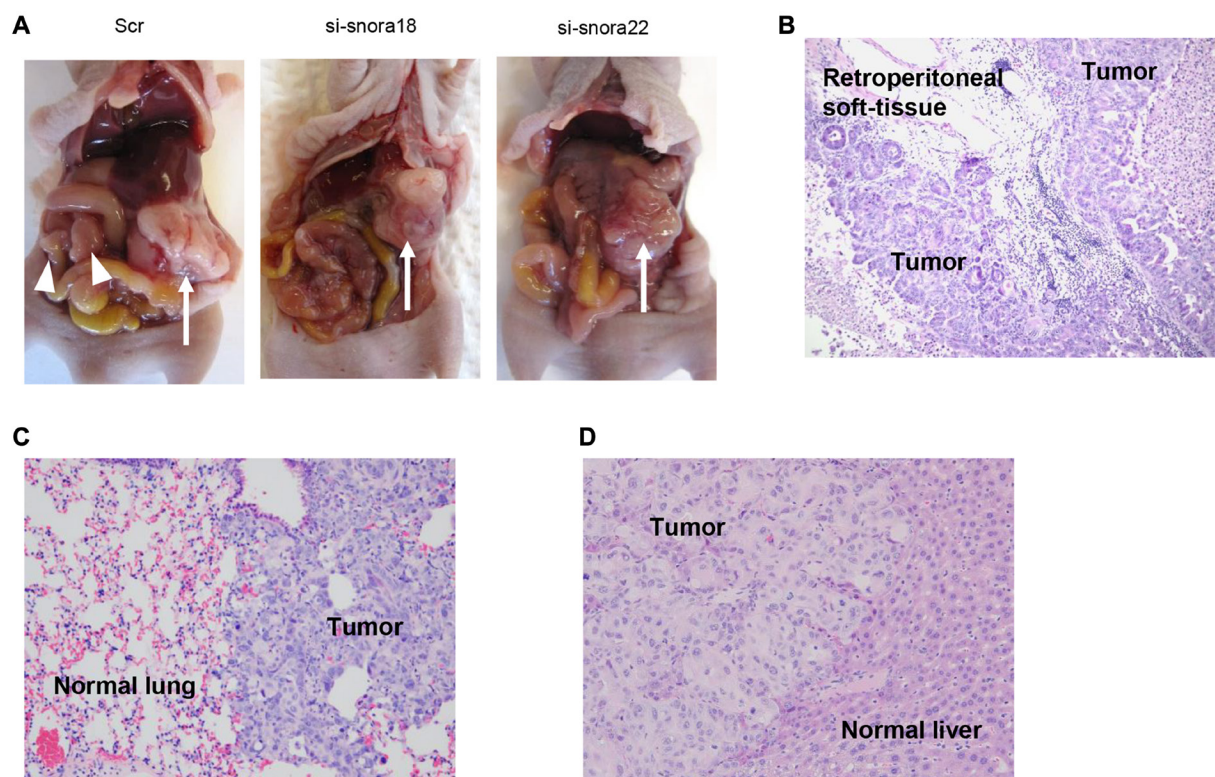

**Figure 9: Knockdown effect of siRNA-FA-PEG-COL nanoparticles targeting KHSRP-bound snoRNAs on cell motility and invasion in the orthotopic murine model of PDAC.** (A) Development of carcinomatosis in S2-013 tumor-bearing mice treated with scrambled control siRNA-FA-PEG-COL nanoparticles (Scr) and target siRNA-FA-PEG-COL nanoparticles against *SNORA18* (si-snora18) and *SNORA22* (si-snora22). Arrow, primary tumor; arrowheads, dissemination nodules in the abdominal cavity. (B–D) Hematoxylin and eosin staining of representative sections of S2-013-derived PDAC tumor tissues in mice treated with scrambled control siRNA-FA-PEG-COL nanoparticles showing areas of regional invasion of the retroperitoneum (B) and distant metastases to the lung (C) and liver (D). Original magnification: 200 $\times$ .
